# Supplementary material for: A phosphomide based PNP ligand, 2,6-{Ph2PC(O)}2(C5H3N), showing PP, PNP and PNO coordination modes
Source: Royal Society of Chemistry journal article supplement (doi:10.1039/c4dt03960b), 2015-01-01
Supplement: c4dt03960b1.pdf [file c4dt03960b1.pdf]

*Supporting Information for*

**A phosphonide based PNP pincer ligand, 2,6- $\{\text{Ph}_2\text{PC}(\text{O})\}_2(\text{C}_5\text{H}_3\text{N})$   
showing PP, PNP and PNO coordination modes**

Pawan Kumar,<sup>a</sup> Vitthalrao S. Kashid<sup>a</sup>, Yernaaidu Reddi, Joel T Mague<sup>b</sup>, Raghavan B. Sunoj and  
Maravanji S. Balakrishna<sup>a\*</sup>

<sup>a</sup>*Phosphorus Laboratory, Department of Chemistry, Indian Institute of Technology Bombay,  
Mumbai 400 076, India, and* <sup>b</sup>*Department of Chemistry, Tulane University, New Orleans,  
Louisiana 70118.*

## AOMix Analysis

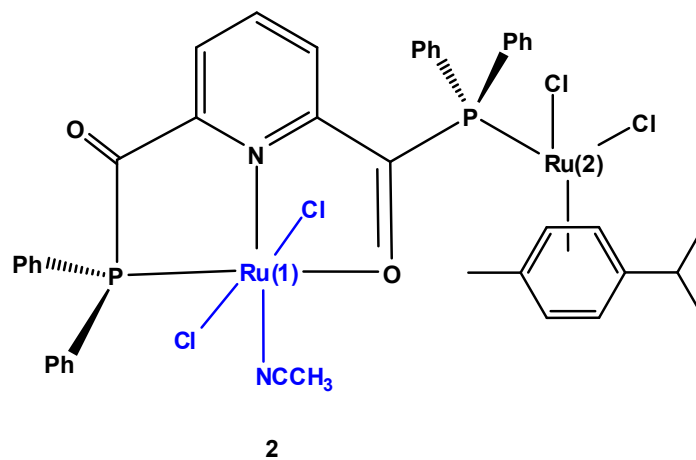

**Fig. S1.** Ruthenium PNO pincer complex **2**

**Table S1.** Composition<sup>a</sup> and energies of important Kohn–Sham orbitals of Ruthenium pincer complex **2** obtained using the wave function generated at the B3LYP/6-31G\*\*, SDD level of theory

| Orbital | Energy (eV) | Orbital character                   |
|---------|-------------|-------------------------------------|
| LUMO    | -1.849      | 33.67% $d_{xz}$ Ru, 66.33% PNP      |
| HOMO    | -3.191      | 11.51% $d_{xz}$ Ru, 88.49% PNP      |
| HOMO-19 | -9.022      | 12.78% $d_{xy}$ Ru, 87.22% PNP      |
| HOMO-24 | -9.592      | 1.45% $d_{x^2-y^2}$ Ru, 98.55% PNP  |
| HOMO-37 | -10.905     | 12.06% $d_{x^2-y^2}$ Ru, 87.94% PNP |

<sup>a</sup>combination of PNP pincer and  $[\text{RuCl}_2(\text{CH}_3\text{CN})]$  are considered as two interacting fragments in AOMix analysis.

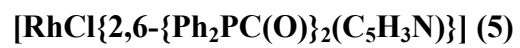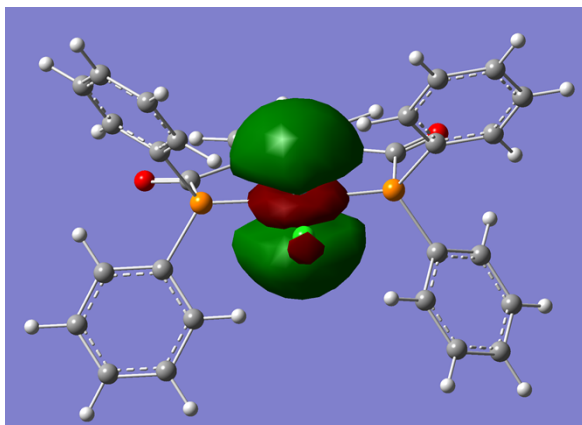

HOMO

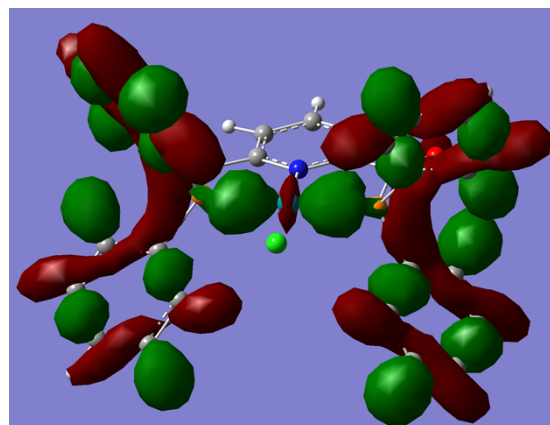

HOMO-26

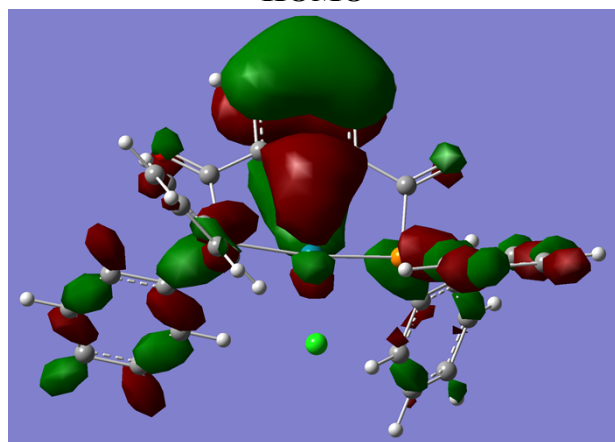

HOMO-21

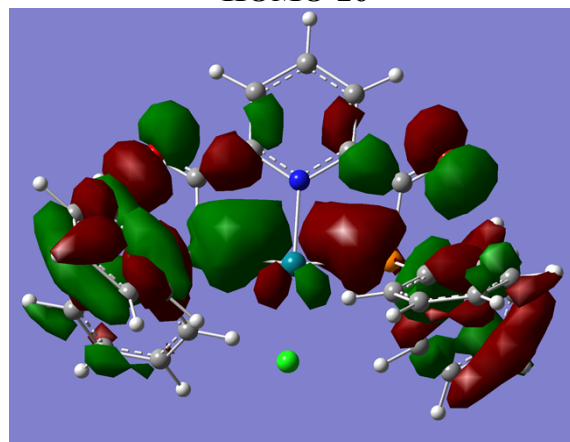

HOMO-18

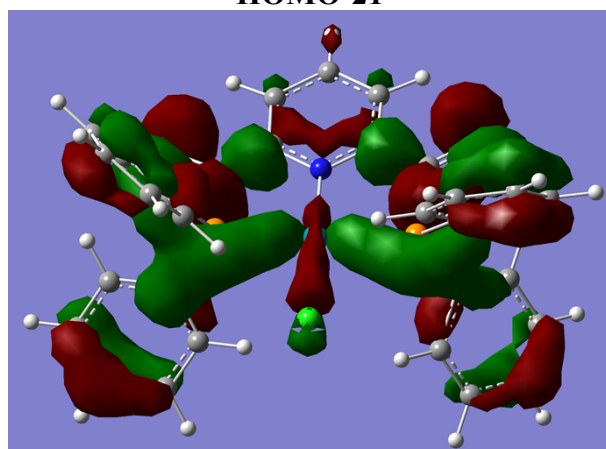

HOMO-14

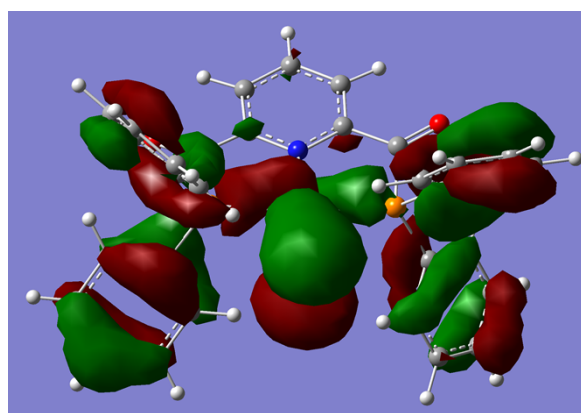

HOMO-13

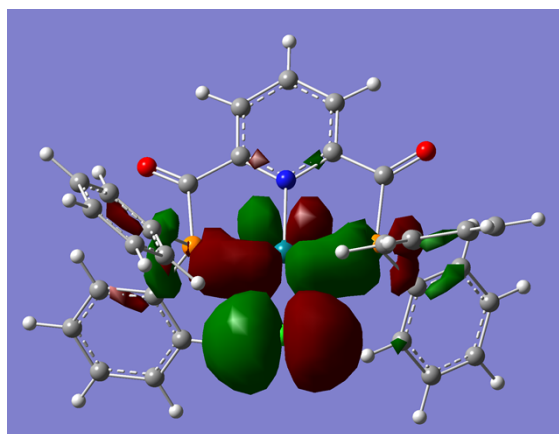

**HOMO-2**

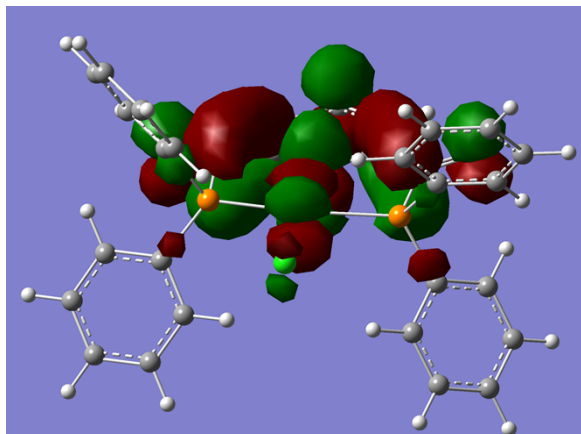

**LUMO**

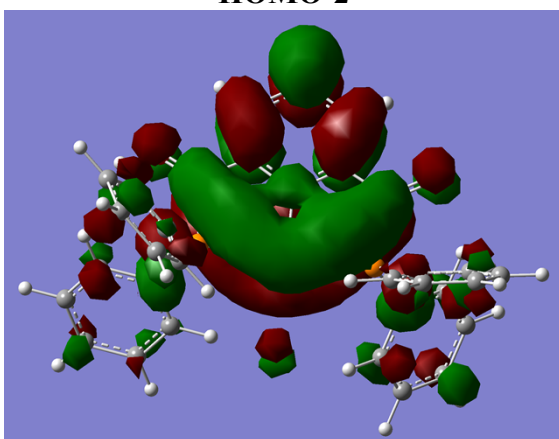

**LUMO+2**

**Fig. S2.** Selected set of Kohn–Sham orbital contours for key orbitals of Rh-PNP pincer complex 5.

### Electrostatic Potential

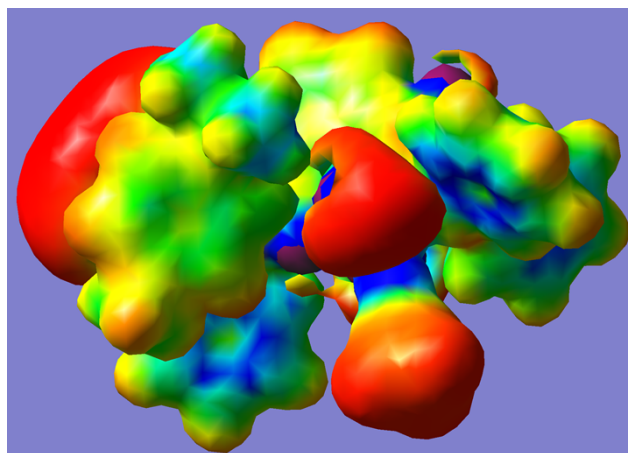

red is  $2.5 \cdot 10^{-5}$ , blue is  $2.5 \cdot 10^{-2}$

**Fig. S3.** Electrostatic potential map for ruthenium PNO pincer complex 2

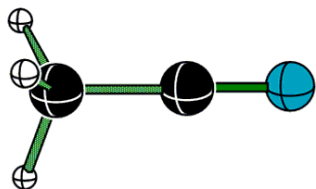

CH<sub>3</sub>CN

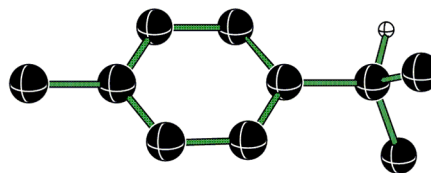

p-cymene

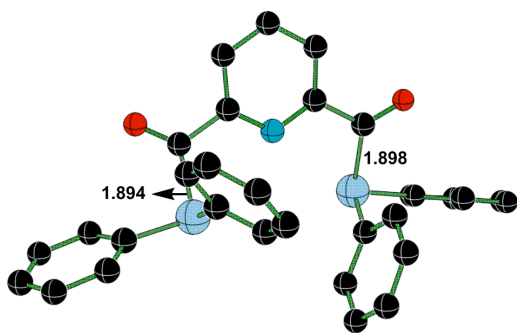

2,6-{Ph<sub>2</sub>PC(O)}<sub>2</sub>(C<sub>5</sub>H<sub>3</sub>N) (PNP) (1)

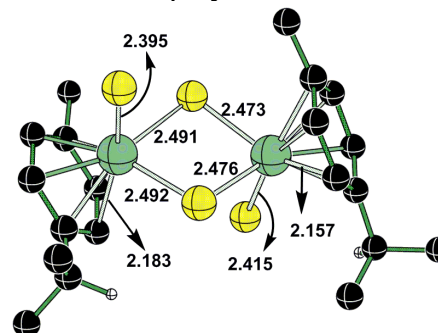

[RuCl<sub>2</sub>(p-cymene)]<sub>2</sub>

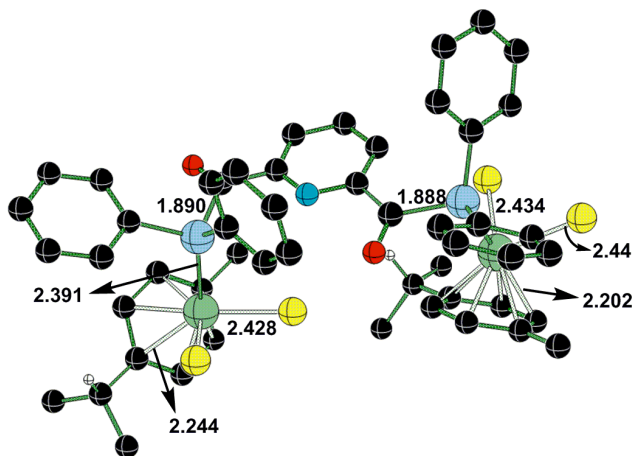

[Ru<sub>2</sub>Cl<sub>4</sub>(p-cymene){2,6-{Ph<sub>2</sub>PC(O)}<sub>2</sub>(C<sub>5</sub>H<sub>3</sub>N)}] (2a)

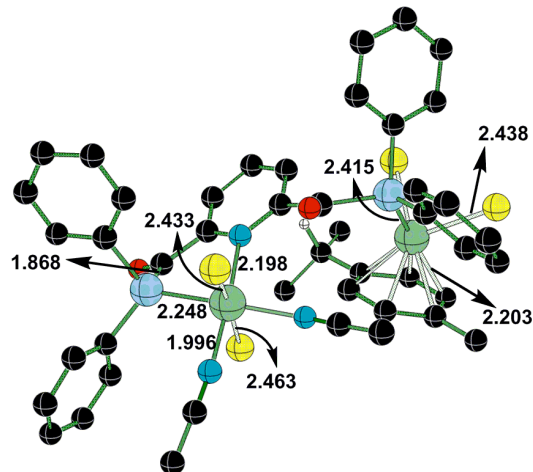

[Ru<sub>2</sub>Cl<sub>4</sub>(CH<sub>3</sub>CN)<sub>2</sub>(p-cymene){2,6-{Ph<sub>2</sub>PC(O)}<sub>2</sub>(C<sub>5</sub>H<sub>3</sub>N)}] (2b)

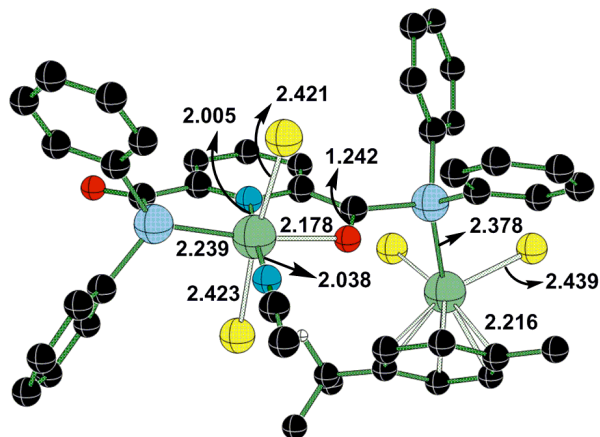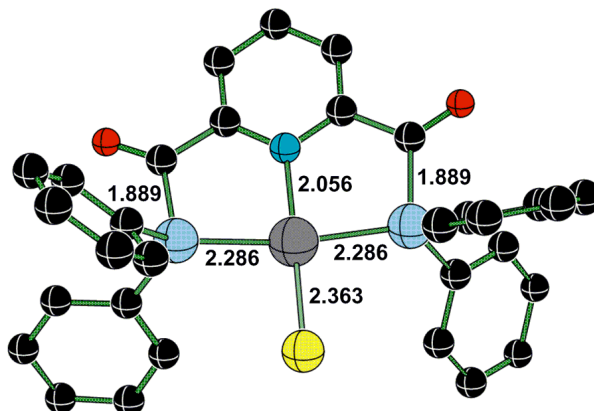

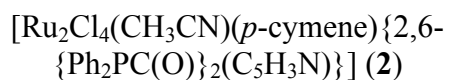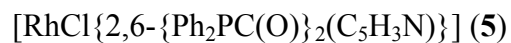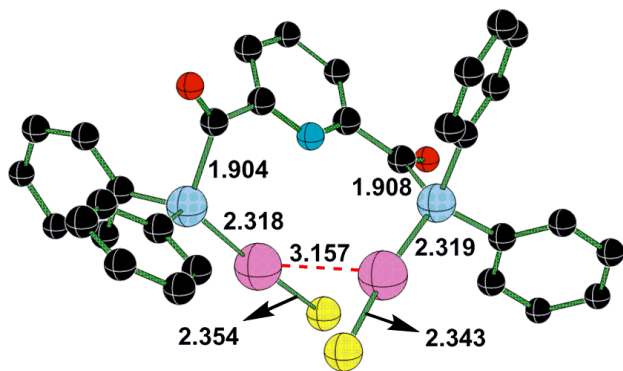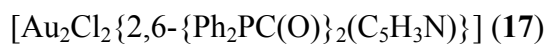

**Fig. S4.** The key optimized geometries of complexes PNP (1), p-cymene, CH<sub>3</sub>CN, [RuCl<sub>2</sub>(p-cymene)]<sub>2</sub>, 2a, 2b, 2, 5 and 17 at M06 & B3LYP/6-31G\*\*, SDD level of theory.

Total electronic energies and Gibbs free energies (in a.u.) and Cartesian coordinates of geometries optimized at the M06 & B3LYP/6-31G\*, SDD level of theory

2,6-{Ph<sub>2</sub>PC(O)}<sub>2</sub>(C<sub>5</sub>H<sub>3</sub>N) (PNP) (1)

E<sub>ele</sub> = -2081.9501679  
G = -2081.561652  
N<sub>imag</sub> = 0

|    |           |           |           |
|----|-----------|-----------|-----------|
| 6  | 1.047395  | -2.159657 | 0.788620  |
| 6  | 1.189276  | -3.105013 | 1.806780  |
| 6  | 0.080140  | -3.412012 | 2.582230  |
| 6  | -1.132440 | -2.804106 | 2.282529  |
| 6  | -1.179326 | -1.906193 | 1.216032  |
| 7  | -0.107233 | -1.563062 | 0.500962  |
| 1  | 0.154885  | -4.127700 | 3.397332  |
| 1  | 2.158639  | -3.572119 | 1.958840  |
| 1  | -2.046953 | -3.015103 | 2.829932  |
| 6  | 2.238281  | -1.807683 | -0.053027 |
| 6  | -2.498625 | -1.338035 | 0.786692  |
| 8  | -3.500900 | -1.538925 | 1.439864  |
| 8  | 3.150382  | -2.595152 | -0.184715 |
| 15 | -2.494565 | -0.443684 | -0.888138 |
| 15 | 2.179846  | -0.075385 | -0.817713 |
| 6  | -4.313843 | -0.250051 | -1.082670 |
| 6  | -4.895445 | -0.956595 | -2.139493 |
| 6  | -5.133204 | 0.531675  | -0.263401 |
| 6  | -6.266093 | -0.891815 | -2.371970 |
| 1  | -4.262438 | -1.561498 | -2.788558 |
| 6  | -6.500779 | 0.601547  | -0.496093 |
| 1  | -4.697614 | 1.096924  | 0.558324  |
| 1  | -6.704504 | -1.446644 | -3.198454 |
| 1  | -7.128239 | 1.214410  | 0.147535  |
| 6  | -1.998232 | 1.229035  | -0.293034 |
| 6  | -2.184999 | 1.690127  | 1.015268  |
| 6  | -1.460168 | 2.102308  | -1.244585 |
| 6  | -1.870238 | 3.003013  | 1.353267  |
| 1  | -2.593765 | 1.025629  | 1.776051  |
| 6  | -1.151713 | 3.416782  | -0.908777 |
| 1  | -1.285712 | 1.743291  | -2.257990 |
| 1  | -2.025996 | 3.350028  | 2.372869  |
| 1  | -0.743728 | 4.087170  | -1.661715 |
| 6  | 3.891052  | -0.015620 | -1.478039 |
| 6  | 4.268369  | -0.964656 | -2.435256 |
| 6  | 4.782135  | 1.014133  | -1.163124 |
| 6  | 5.516255  | -0.899025 | -3.042253 |
| 1  | 3.584294  | -1.768895 | -2.700255 |
| 6  | 6.027604  | 1.084048  | -1.779388 |
| 1  | 4.503849  | 1.765996  | -0.426530 |
| 1  | 5.799762  | -1.651545 | -3.774770 |

p-cymene

E<sub>ele</sub> = -389.19537  
G = -389.020543  
N<sub>imag</sub> = 0

|   |           |           |           |
|---|-----------|-----------|-----------|
| 6 | -0.031717 | -1.037561 | 0.051344  |
| 6 | 1.349103  | -1.180148 | 0.078897  |
| 6 | 2.191451  | -0.067557 | 0.015807  |
| 6 | 1.600653  | 1.192392  | -0.069208 |
| 6 | 0.217174  | 1.334667  | -0.096783 |
| 6 | -0.624544 | 0.225004  | -0.037791 |
| 1 | -0.659927 | -1.927203 | 0.102759  |
| 1 | 1.788040  | -2.175241 | 0.153021  |
| 1 | 2.235637  | 2.077234  | -0.112379 |
| 1 | -0.221363 | 2.330624  | -0.161585 |
| 6 | 3.682656  | -0.226806 | 0.013818  |
| 1 | 4.069073  | -0.370832 | -1.003684 |
| 1 | 4.181781  | 0.657002  | 0.426202  |
| 1 | 3.995386  | -1.096608 | 0.602322  |
| 6 | -2.127592 | 0.385025  | -0.048398 |
| 6 | -2.742027 | -0.053844 | 1.279442  |
| 6 | -2.770542 | -0.363184 | -1.213231 |
| 1 | -2.338793 | 1.458306  | -0.178441 |
| 1 | -2.296602 | 0.484804  | 2.123307  |
| 1 | -3.824403 | 0.124141  | 1.289407  |
| 1 | -2.581833 | -1.126679 | 1.448823  |
| 1 | -2.354664 | -0.041524 | -2.174517 |
| 1 | -2.605496 | -1.445019 | -1.124650 |
| 1 | -3.854523 | -0.196934 | -1.233963 |

CH<sub>3</sub>CN

E<sub>ele</sub> = -132.6561071  
G = -132.633726  
N<sub>imag</sub> = 0

|   |           |           |           |
|---|-----------|-----------|-----------|
| 6 | 0.000000  | 0.000000  | 0.276667  |
| 7 | 0.000000  | 0.000000  | 1.437194  |
| 6 | 0.000000  | 0.000000  | -1.175290 |
| 1 | 0.000000  | 1.025430  | -1.556208 |
| 1 | 0.888048  | -0.512715 | -1.556208 |
| 1 | -0.888048 | -0.512715 | -1.556208 |

|   |           |           |           |
|---|-----------|-----------|-----------|
| 1 | 6.710624  | 1.891146  | -1.523046 |
| 6 | 2.356446  | 0.771319  | 0.814488  |
| 6 | 1.502028  | 1.832537  | 1.112526  |
| 6 | 3.297203  | 0.363688  | 1.770157  |
| 6 | 1.585506  | 2.482029  | 2.341645  |
| 1 | 0.769901  | 2.156165  | 0.374487  |
| 6 | 3.378354  | 1.010512  | 2.996863  |
| 1 | 3.974455  | -0.460169 | 1.543368  |
| 1 | 0.913353  | 3.310601  | 2.556791  |
| 1 | 4.111184  | 0.686429  | 3.732639  |
| 6 | -7.069366 | -0.110810 | -1.549555 |
| 1 | -8.140608 | -0.052392 | -1.729774 |
| 6 | -1.361592 | 3.870404  | 0.390823  |
| 1 | -1.121777 | 4.898244  | 0.654938  |
| 6 | 6.399394  | 0.126151  | -2.716511 |
| 1 | 7.374529  | 0.180134  | -3.195427 |
| 6 | 2.520921  | 2.070925  | 3.283931  |
| 1 | 2.585626  | 2.576222  | 4.245209  |

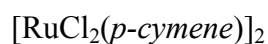

$$E_{\text{ele}} = -2809.0750673$$

$$G = -2808.700503$$

$$N_{\text{imag}} = 0$$

|    |           |           |           |
|----|-----------|-----------|-----------|
| 44 | 1.779199  | -0.310382 | 0.078389  |
| 17 | -0.028210 | -1.898117 | 0.653870  |
| 17 | -0.059513 | 0.984442  | -0.958738 |
| 17 | 1.261026  | 0.817642  | 2.149786  |
| 44 | -1.903647 | -0.402942 | -0.017718 |
| 17 | -1.914003 | -1.563461 | -2.112382 |
| 6  | 3.155498  | 0.518184  | -1.360974 |
| 6  | 2.660787  | -0.719732 | -1.876904 |
| 6  | 2.733217  | -1.904647 | -1.110577 |
| 6  | 3.324935  | -1.821372 | 0.195914  |
| 6  | 3.824982  | -0.597764 | 0.695692  |
| 6  | 3.749797  | 0.609593  | -0.076291 |
| 1  | 2.951630  | 1.428298  | -1.920284 |
| 1  | 2.090123  | -0.723666 | -2.803647 |
| 1  | 3.279861  | -2.689738 | 0.850028  |
| 1  | 4.149762  | -0.536090 | 1.732938  |
| 6  | 2.103492  | -3.166735 | -1.601744 |
| 1  | 1.904291  | -3.858347 | -0.778266 |
| 1  | 1.148559  | -2.955037 | -2.096919 |
| 1  | 2.769178  | -3.664735 | -2.317544 |
| 6  | 4.222680  | 1.906832  | 0.524992  |
| 1  | 3.986130  | 1.846883  | 1.598376  |
| 6  | 5.737939  | 2.010699  | 0.351541  |
| 1  | 6.117913  | 2.923711  | 0.823698  |

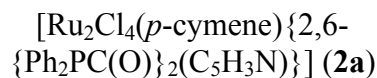

$$E_{\text{ele}} = -4891.0838181$$

$$G = -4890.286957$$

$$N_{\text{imag}} = 0$$

|    |           |           |           |
|----|-----------|-----------|-----------|
| 6  | -7.319077 | 3.384644  | -0.700537 |
| 6  | -6.598072 | 3.180449  | -1.870114 |
| 6  | -5.354893 | 2.549836  | -1.834912 |
| 6  | -4.826100 | 2.115931  | -0.616974 |
| 6  | -5.554099 | 2.333919  | 0.563295  |
| 6  | -6.791185 | 2.963040  | 0.518110  |
| 15 | -3.245560 | 1.207972  | -0.381217 |
| 6  | -2.247145 | 2.406882  | 0.567000  |
| 6  | -1.435106 | 2.004811  | 1.626597  |
| 6  | -0.661157 | 2.951262  | 2.289786  |
| 6  | -0.677017 | 4.283677  | 1.890131  |
| 6  | -1.481477 | 4.683813  | 0.825509  |
| 6  | -2.272650 | 3.748467  | 0.169990  |
| 44 | -3.767483 | -1.035571 | 0.259608  |
| 17 | -1.399616 | -1.464093 | 0.582838  |
| 8  | 1.197530  | 0.800537  | 1.097370  |
| 6  | 1.785768  | 0.895279  | 0.041377  |
| 6  | 1.042023  | 0.876191  | -1.262778 |
| 6  | 1.677409  | 0.693475  | -2.494167 |
| 6  | 0.896696  | 0.618957  | -3.643688 |
| 6  | -0.475483 | 0.756194  | -3.530623 |
| 6  | -1.011501 | 0.964287  | -2.253034 |
| 7  | -0.279788 | 1.016367  | -1.148560 |
| 6  | -2.488973 | 1.079289  | -2.108646 |



|   |           |           |           |    |           |           |           |
|---|-----------|-----------|-----------|----|-----------|-----------|-----------|
| 1 | 6.260016  | 1.155553  | 0.797549  | 8  | -3.217055 | 0.934776  | -3.077771 |
| 1 | 6.002515  | 2.048023  | -0.714022 | 15 | 3.672169  | 0.851432  | 0.114430  |
| 6 | 3.515788  | 3.130661  | -0.037107 | 6  | 4.278191  | 2.054897  | -1.122140 |
| 1 | 3.816049  | 4.021490  | 0.524993  | 6  | 5.370114  | 1.763570  | -1.942149 |
| 1 | 3.785132  | 3.308482  | -1.087361 | 6  | 5.817544  | 2.716020  | -2.854248 |
| 1 | 2.426550  | 3.031759  | 0.038641  | 6  | 5.183642  | 3.948995  | -2.953664 |
| 6 | -3.212224 | 1.329798  | 0.145972  | 6  | 4.098017  | 4.244377  | -2.132209 |
| 6 | -3.962372 | 0.194393  | -0.251532 | 6  | 3.649045  | 3.303321  | -1.215735 |
| 6 | -3.903407 | -1.021932 | 0.496286  | 44 | 4.157613  | -1.487593 | 0.073231  |
| 6 | -3.097367 | -1.121405 | 1.659787  | 17 | 4.264401  | -1.393219 | -2.356892 |
| 6 | -2.358398 | 0.034840  | 2.079732  | 6  | 4.739319  | -3.310140 | 1.164186  |
| 6 | -2.416150 | 1.228889  | 1.338360  | 6  | 4.329489  | -2.319083 | 2.116173  |
| 1 | -4.473280 | 0.192630  | -1.210843 | 6  | 3.045500  | -1.746444 | 1.940956  |
| 1 | -4.373301 | -1.917150 | 0.095002  | 6  | 2.190217  | -2.150729 | 0.873236  |
| 1 | -1.619067 | -0.058394 | 2.873799  | 6  | 2.607716  | -3.124079 | -0.062372 |
| 1 | -1.725023 | 2.033739  | 1.586920  | 6  | 3.907431  | -3.706548 | 0.103448  |
| 6 | -2.945243 | -2.423561 | 2.374740  | 6  | 5.247152  | -1.894871 | 3.214669  |
| 1 | -3.686730 | -2.500187 | 3.179805  | 6  | 1.652247  | -3.545432 | -1.155202 |
| 1 | -3.093424 | -3.263801 | 1.688558  | 6  | 0.537434  | -4.380108 | -0.514892 |
| 1 | -1.947685 | -2.513756 | 2.815548  | 6  | 2.301458  | -4.322866 | -2.289770 |
| 6 | -3.170863 | 2.601869  | -0.661765 | 17 | 6.527730  | -0.908139 | 0.048500  |
| 1 | -2.154331 | 3.008096  | -0.544074 | 6  | 4.011424  | 1.714047  | 1.698087  |
| 6 | -3.428205 | 2.393766  | -2.146926 | 6  | 5.255955  | 1.483694  | 2.293033  |
| 1 | -3.265744 | 3.333734  | -2.685549 | 6  | 5.609071  | 2.156471  | 3.459231  |
| 1 | -2.761889 | 1.633800  | -2.571789 | 6  | 4.727061  | 3.060913  | 4.040219  |
| 1 | -4.466674 | 2.090988  | -2.337274 | 6  | 3.491864  | 3.300843  | 3.445373  |
| 6 | -4.164955 | 3.595985  | -0.060060 | 6  | 3.133195  | 2.637353  | 2.277877  |
| 1 | -3.963827 | 3.783971  | 1.001401  | 17 | -3.860443 | -0.150299 | 2.517229  |
| 1 | -4.117905 | 4.554194  | -0.589792 | 1  | 1.367005  | 0.451541  | -4.609026 |
| 1 | -5.190771 | 3.213066  | -0.147350 | 1  | 2.754015  | 0.562531  | -2.560114 |
|   |           |           |           | 1  | -1.141939 | 0.703885  | -4.386949 |
|   |           |           |           | 1  | -1.388669 | 0.957194  | 1.909187  |
|   |           |           |           | 1  | -2.915141 | 4.066095  | -0.651489 |
|   |           |           |           | 1  | -0.028683 | 2.634209  | 3.117126  |
|   |           |           |           | 1  | -1.499987 | 5.724717  | 0.510918  |
|   |           |           |           | 1  | 5.857819  | 0.794470  | -1.864108 |
|   |           |           |           | 1  | 2.804543  | 3.547762  | -0.570305 |
|   |           |           |           | 1  | 6.668693  | 2.485663  | -3.490336 |
|   |           |           |           | 1  | 3.602451  | 5.209813  | -2.203999 |
|   |           |           |           | 1  | 5.947759  | 0.777550  | 1.832565  |
|   |           |           |           | 1  | 2.158883  | 2.833956  | 1.838274  |
|   |           |           |           | 1  | 6.580493  | 1.970576  | 3.912045  |
|   |           |           |           | 1  | 2.796042  | 4.009629  | 3.890907  |
|   |           |           |           | 1  | -0.063016 | 5.015555  | 2.412684  |
|   |           |           |           | 1  | 5.002087  | 3.582753  | 4.954118  |
|   |           |           |           | 1  | 5.537439  | 4.686630  | -3.670693 |
|   |           |           |           | 1  | 2.723546  | -0.937735 | 2.595855  |
|   |           |           |           | 1  | 1.223123  | -1.661623 | 0.747158  |
|   |           |           |           | 1  | 4.298965  | -4.376985 | -0.656100 |
|   |           |           |           | 1  | 5.765813  | -3.669634 | 1.198554  |
|   |           |           |           | 1  | 4.957798  | -0.917483 | 3.615459  |

|   |           |           |           |
|---|-----------|-----------|-----------|
| 1 | 5.224137  | -2.623498 | 4.034488  |
| 1 | 6.276369  | -1.821244 | 2.844597  |
| 1 | 1.204544  | -2.622038 | -1.560472 |
| 1 | -0.024104 | -3.814783 | 0.238020  |
| 1 | -0.170286 | -4.710910 | -1.285991 |
| 1 | 0.957090  | -5.279087 | -0.042172 |
| 1 | 1.553533  | -4.538182 | -3.061101 |
| 1 | 3.120965  | -3.763238 | -2.750992 |
| 1 | 2.682689  | -5.290752 | -1.934660 |
| 1 | -4.810665 | 2.386034  | -2.759392 |
| 1 | -5.153436 | 1.984717  | 1.515884  |
| 1 | -6.999913 | 3.513830  | -2.824380 |
| 1 | -7.344738 | 3.124150  | 1.440431  |
| 1 | -8.289670 | 3.874317  | -0.735757 |
| 6 | -5.794301 | -1.936802 | 0.603026  |
| 6 | -4.807895 | -2.972560 | 0.649945  |
| 6 | -3.886586 | -3.126841 | -0.406670 |
| 6 | -3.906507 | -2.288550 | -1.562488 |
| 6 | -4.887158 | -1.259903 | -1.592374 |
| 6 | -5.827857 | -1.092987 | -0.533843 |
| 1 | -4.694031 | -3.570492 | 1.548460  |
| 1 | -3.062313 | -3.829417 | -0.291132 |
| 1 | -4.868023 | -0.540767 | -2.410269 |
| 1 | -6.522310 | -0.253451 | -0.557432 |
| 6 | -6.798046 | -1.716168 | 1.708733  |
| 1 | -6.817599 | -0.630870 | 1.896652  |
| 6 | -8.175327 | -2.157366 | 1.205525  |
| 1 | -8.171490 | -3.229145 | 0.965194  |
| 1 | -8.484890 | -1.612305 | 0.306543  |
| 6 | -6.457835 | -2.423359 | 3.011822  |
| 1 | -5.465439 | -2.136853 | 3.376446  |
| 1 | -6.503095 | -3.515281 | 2.895244  |
| 6 | -2.879284 | -2.442841 | -2.637329 |
| 1 | -3.087257 | -3.326163 | -3.253366 |
| 1 | -2.868334 | -1.565794 | -3.293771 |
| 1 | -1.882730 | -2.558472 | -2.190598 |
| 1 | -8.932577 | -1.992852 | 1.980393  |
| 1 | -7.192330 | -2.153030 | 3.778281  |

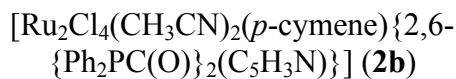

$$E_{\text{ele}} = -4767.2243988$$

$$G = -4766.545506$$

$$N_{\text{imag}} = 0$$

|   |           |           |          |
|---|-----------|-----------|----------|
| 6 | -7.629632 | -1.894307 | 1.376089 |
| 6 | -7.546770 | -0.505627 | 1.292911 |
| 6 | -6.457906 | 0.086899  | 0.662772 |
| 6 | -5.450339 | -0.708967 | 0.105500 |

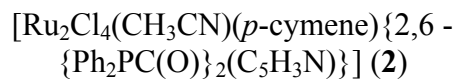

$$E_{\text{ele}} = -4634.5791941$$

$$G = -4633.945333$$

$$N_{\text{imag}} = 0$$

|   |          |          |           |
|---|----------|----------|-----------|
| 6 | 6.478168 | 3.742910 | 0.606983  |
| 6 | 6.684219 | 2.547772 | 1.289102  |
| 6 | 5.934499 | 1.424255 | 0.961121  |
| 6 | 4.970943 | 1.490105 | -0.049578 |

|    |           |           |           |    |           |           |           |
|----|-----------|-----------|-----------|----|-----------|-----------|-----------|
| 6  | -5.529805 | -2.100683 | 0.200207  | 6  | 4.760291  | 2.695035  | -0.722468 |
| 6  | -6.622414 | -2.686584 | 0.831709  | 6  | 5.518326  | 3.813513  | -0.397847 |
| 15 | -3.953488 | 0.122749  | -0.494123 | 15 | 3.951381  | 0.006932  | -0.354734 |
| 6  | -4.546835 | 1.429524  | -1.630756 | 6  | 5.211750  | -1.316203 | -0.400376 |
| 6  | -3.831301 | 2.620283  | -1.782693 | 6  | 5.206557  | -2.314620 | 0.576512  |
| 6  | -4.233398 | 3.547552  | -2.740419 | 6  | 6.215234  | -3.274035 | 0.590700  |
| 6  | -5.334345 | 3.290295  | -3.549207 | 6  | 7.219537  | -3.246184 | -0.370120 |
| 6  | -6.039503 | 2.096810  | -3.410765 | 6  | 7.225013  | -2.253352 | -1.347391 |
| 6  | -5.645973 | 1.165353  | -2.459082 | 6  | 6.230597  | -1.283855 | -1.360882 |
| 44 | -2.190395 | 0.275373  | 0.892184  | 44 | 1.919614  | -0.217741 | 0.559355  |
| 17 | -2.488611 | 2.659742  | 1.272739  | 17 | 1.889375  | -2.637758 | 0.612051  |
| 8  | 0.499730  | 2.285367  | 0.310322  | 8  | -0.229103 | -0.441628 | 0.836977  |
| 6  | 0.981770  | 1.355275  | -0.282471 | 6  | -0.836404 | -0.675773 | -0.221480 |
| 6  | 0.200180  | 0.533537  | -1.264299 | 6  | -0.109374 | -0.526167 | -1.489721 |
| 6  | 0.851029  | 0.205421  | -2.452627 | 6  | -0.675987 | -0.573033 | -2.765763 |
| 6  | 0.184873  | -0.500635 | -3.442249 | 6  | 0.120646  | -0.343755 | -3.880179 |
| 6  | -1.117383 | -0.888253 | -3.183555 | 6  | 1.471751  | -0.090269 | -3.694797 |
| 6  | -1.706282 | -0.536921 | -1.974658 | 6  | 1.990526  | -0.068977 | -2.405943 |
| 7  | -1.086922 | 0.191843  | -1.006684 | 7  | 1.218640  | -0.275673 | -1.318519 |
| 6  | -3.136526 | -0.954485 | -1.783424 | 6  | 3.438243  | 0.181631  | -2.181129 |
| 8  | -3.663888 | -1.812638 | -2.453350 | 8  | 4.198532  | 0.467073  | -3.080595 |
| 15 | 2.862934  | 0.941333  | -0.067016 | 15 | -2.658870 | -1.029040 | -0.064974 |
| 6  | 3.570414  | 2.052960  | -1.355926 | 6  | -3.010000 | -2.260817 | -1.370561 |
| 6  | 4.927049  | 1.920767  | -1.673325 | 6  | -4.069820 | -2.099790 | -2.265625 |
| 6  | 5.515010  | 2.795467  | -2.578893 | 6  | -4.289011 | -3.062738 | -3.247268 |
| 6  | 4.764259  | 3.799441  | -3.182176 | 6  | -3.460960 | -4.175248 | -3.340412 |
| 6  | 3.416432  | 3.934917  | -2.871529 | 6  | -2.410303 | -4.342549 | -2.440668 |
| 6  | 2.820557  | 3.068924  | -1.959478 | 6  | -2.188207 | -3.393428 | -1.451954 |
| 44 | 3.414570  | -1.410171 | -0.030359 | 44 | -3.645274 | 1.131332  | 0.067194  |
| 17 | 3.943381  | -1.162679 | -2.389854 | 17 | -3.478243 | 1.210637  | -2.358669 |
| 6  | 3.900722  | -3.266561 | 1.052195  | 6  | -4.702833 | 2.607188  | 1.312169  |
| 6  | 3.198936  | -2.414198 | 1.961166  | 6  | -4.054838 | 1.669787  | 2.177558  |
| 6  | 1.945683  | -1.912073 | 1.537736  | 6  | -2.662571 | 1.475460  | 1.985739  |
| 6  | 1.385026  | -2.277505 | 0.279470  | 6  | -1.934011 | 2.201087  | 0.998084  |
| 6  | 2.075623  | -3.142474 | -0.599535 | 6  | -2.591449 | 3.123277  | 0.150206  |
| 6  | 3.360303  | -3.627775 | -0.192040 | 6  | -3.999468 | 3.321726  | 0.325413  |
| 6  | 3.801617  | -2.093544 | 3.289910  | 6  | -4.837781 | 0.909675  | 3.196376  |
| 6  | 1.439157  | -3.525536 | -1.914931 | 6  | -1.779290 | 3.866796  | -0.882755 |
| 6  | 0.146177  | -4.300398 | -1.645103 | 6  | -0.855805 | 4.845678  | -0.151524 |
| 6  | 2.355821  | -4.306553 | -2.843938 | 6  | -2.614279 | 4.598260  | -1.922050 |
| 17 | 5.711281  | -0.747400 | 0.450627  | 17 | -5.807583 | 0.030413  | -0.178579 |
| 6  | 3.242143  | 1.892544  | 1.458096  | 6  | -2.755134 | -2.046491 | 1.457250  |
| 6  | 3.918710  | 1.256305  | 2.499464  | 6  | -4.041507 | -2.215894 | 1.984534  |
| 6  | 4.283088  | 1.958036  | 3.645392  | 6  | -4.237526 | -3.026413 | 3.097420  |
| 6  | 3.974455  | 3.308706  | 3.757892  | 6  | -3.156812 | -3.672695 | 3.689229  |
| 6  | 3.308387  | 3.956447  | 2.717906  | 6  | -1.881056 | -3.516713 | 3.157093  |
| 6  | 2.950609  | 3.258586  | 1.569432  | 6  | -1.670783 | -2.710380 | 2.042256  |
| 7  | -3.363895 | 0.035551  | 2.488811  | 7  | 2.494162  | -0.138537 | 2.512756  |
| 6  | -4.137517 | -0.205181 | 3.313818  | 6  | 2.796015  | -0.045684 | 3.625416  |
| 6  | -5.151541 | -0.535598 | 4.291877  | 6  | 3.169599  | 0.080240  | 5.018140  |
| 17 | -2.006984 | -2.179326 | 0.808418  | 17 | 1.681408  | 2.193560  | 0.565533  |

|   |           |           |           |   |           |           |           |
|---|-----------|-----------|-----------|---|-----------|-----------|-----------|
| 1 | 0.692365  | -0.762229 | -4.367020 | 1 | -0.315324 | -0.363288 | -4.874108 |
| 1 | 1.894302  | 0.478416  | -2.593773 | 1 | -1.738411 | -0.762862 | -2.876186 |
| 1 | -1.712174 | -1.473723 | -3.879334 | 1 | 2.156363  | 0.094093  | -4.518771 |
| 1 | -2.987371 | 2.825337  | -1.125303 | 1 | 4.394730  | -2.355816 | 1.300051  |
| 1 | -6.189934 | 0.226786  | -2.360871 | 1 | 6.240088  | -0.500603 | -2.116748 |
| 1 | -3.683959 | 4.480029  | -2.846293 | 1 | 6.205969  | -4.052979 | 1.349433  |
| 1 | -6.895680 | 1.888952  | -4.048312 | 1 | 8.010602  | -2.230749 | -2.099060 |
| 1 | 5.515854  | 1.128715  | -1.214948 | 1 | -4.708528 | -1.222829 | -2.197025 |
| 1 | 1.766834  | 3.208849  | -1.724090 | 1 | -1.369003 | -3.536708 | -0.746336 |
| 1 | 6.569185  | 2.681209  | -2.819501 | 1 | -5.114563 | -2.935774 | -3.943272 |
| 1 | 2.820928  | 4.717983  | -3.335085 | 1 | -1.764468 | -5.214881 | -2.504408 |
| 1 | 4.211653  | 0.218825  | 2.377560  | 1 | -4.887398 | -1.710631 | 1.515232  |
| 1 | 2.450239  | 3.781459  | 0.759912  | 1 | -0.660030 | -2.611855 | 1.648398  |
| 1 | 4.826147  | 1.447342  | 4.438530  | 1 | -5.240175 | -3.151601 | 3.500291  |
| 1 | 3.076420  | 5.016079  | 2.794593  | 1 | -1.033254 | -4.028837 | 3.606554  |
| 1 | -5.646098 | 4.020466  | -4.292940 | 1 | 8.002293  | -4.001534 | -0.360199 |
| 1 | 4.263921  | 3.864997  | 4.646849  | 1 | -3.310303 | -4.305006 | 4.560973  |
| 1 | 5.229524  | 4.476657  | -3.894894 | 1 | -3.635209 | -4.920585 | -4.113434 |
| 1 | -6.040963 | -0.910094 | 3.770392  | 1 | 3.938287  | 0.849988  | 5.134390  |
| 1 | -4.789519 | -1.311230 | 4.972922  | 1 | 2.299608  | 0.361907  | 5.618734  |
| 1 | -5.428801 | 0.348035  | 4.874134  | 1 | 3.561606  | -0.869534 | 5.393662  |
| 1 | 1.395324  | -1.220203 | 2.174655  | 1 | -2.145889 | 0.712736  | 2.567877  |
| 1 | 0.408669  | -1.883356 | 0.002757  | 1 | -0.869636 | 2.006314  | 0.852298  |
| 1 | 3.968399  | -4.199615 | -0.885689 | 1 | -4.550203 | 3.944353  | -0.372834 |
| 1 | 4.922316  | -3.554261 | 1.292892  | 1 | -5.788480 | 2.676317  | 1.344589  |
| 1 | 3.257130  | -1.290456 | 3.798384  | 1 | -4.297448 | 0.015449  | 3.524893  |
| 1 | 3.777060  | -2.979005 | 3.937041  | 1 | -5.035378 | 1.535974  | 4.075245  |
| 1 | 4.850499  | -1.791004 | 3.172754  | 1 | -5.799816 | 0.592724  | 2.776493  |
| 1 | 1.173975  | -2.581892 | -2.412370 | 1 | -1.154370 | 3.114242  | -1.390394 |
| 1 | -0.566851 | -3.732805 | -1.033247 | 1 | -0.171773 | 4.330124  | 0.531414  |
| 1 | -0.343972 | -4.548574 | -2.594206 | 1 | -0.250457 | 5.401726  | -0.876389 |
| 1 | 0.362367  | -5.243848 | -1.125768 | 1 | -1.445121 | 5.574161  | 0.422713  |
| 1 | 1.836667  | -4.505215 | -3.788302 | 1 | -1.953363 | 5.058187  | -2.664825 |
| 1 | 3.271638  | -3.748476 | -3.070628 | 1 | -3.296765 | 3.920619  | -2.445162 |
| 1 | 2.620954  | -5.282591 | -2.413724 | 1 | -3.193799 | 5.410480  | -1.460567 |
| 1 | -6.382917 | 1.173154  | 0.604935  | 1 | 6.108857  | 0.482614  | 1.482771  |
| 1 | -4.734026 | -2.719985 | -0.205407 | 1 | 4.003274  | 2.766183  | -1.499487 |
| 1 | -8.332095 | 0.116982  | 1.716053  | 1 | 7.437176  | 2.486454  | 2.071657  |
| 1 | -6.686154 | -3.770073 | 0.897362  | 1 | 5.353869  | 4.747064  | -0.930490 |
| 1 | -8.483453 | -2.360019 | 1.863850  | 1 | 7.068247  | 4.621398  | 0.858175  |
| 7 | -0.557075 | 0.461089  | 2.250798  |   |           |           |           |
| 6 | 0.067920  | 0.942701  | 3.098430  |   |           |           |           |
| 6 | 0.832739  | 1.595119  | 4.136578  |   |           |           |           |
| 1 | 1.548722  | 0.902972  | 4.590582  |   |           |           |           |
| 1 | 1.388320  | 2.435949  | 3.702490  |   |           |           |           |
| 1 | 0.156216  | 1.974328  | 4.907966  |   |           |           |           |

[RhCl{2,6-{Ph<sub>2</sub>PC(O)}<sub>2</sub>(C<sub>5</sub>H<sub>3</sub>N)}] (5)

$$E_{\text{ele}} = -2652.8010806$$

$$G = -2652.411237$$

[Au<sub>2</sub>Cl<sub>2</sub>{2,6-{Ph<sub>2</sub>PC(O)}<sub>2</sub>(C<sub>5</sub>H<sub>3</sub>N)}] (17)

$$E_{\text{ele}} = -3273.9928848$$

$N_{\text{imag}} = 0$

$G = -3273.614190$

$N_{\text{imag}} = 0$

|    |           |           |           |    |           |           |           |
|----|-----------|-----------|-----------|----|-----------|-----------|-----------|
| 6  | 4.658466  | -3.681416 | -1.528294 | 6  | 0.833712  | 2.639423  | -0.198153 |
| 6  | 5.343576  | -2.649227 | -0.891062 | 6  | 0.675639  | 4.021343  | -0.318764 |
| 6  | 4.652996  | -1.536567 | -0.428580 | 6  | -0.461777 | 4.603778  | 0.222928  |
| 6  | 3.267412  | -1.457892 | -0.598381 | 6  | -1.410139 | 3.786962  | 0.828459  |
| 6  | 2.583051  | -2.491561 | -1.244092 | 6  | -1.184027 | 2.410710  | 0.838190  |
| 6  | 3.281607  | -3.602131 | -1.707197 | 7  | -0.076428 | 1.844996  | 0.359881  |
| 15 | 2.278985  | -0.055290 | 0.014678  | 1  | -0.611601 | 5.678933  | 0.170272  |
| 6  | 3.252339  | 1.448924  | -0.342664 | 1  | 1.443252  | 4.599926  | -0.824731 |
| 6  | 2.865790  | 2.174914  | -1.475797 | 1  | -2.320065 | 4.184434  | 1.271310  |
| 6  | 3.569244  | 3.317804  | -1.838260 | 6  | 2.083537  | 1.999350  | -0.712737 |
| 6  | 4.645226  | 3.750335  | -1.068727 | 6  | -2.254455 | 1.501607  | 1.352914  |
| 6  | 5.023715  | 3.037363  | 0.064876  | 8  | -2.861238 | 1.721943  | 2.374438  |
| 6  | 4.333163  | 1.886170  | 0.430446  | 8  | 2.793156  | 2.550094  | -1.517744 |
| 8  | -3.494580 | 0.413620  | 2.474431  | 15 | -2.780820 | 0.092014  | 0.185535  |
| 6  | -2.448838 | 0.220083  | 1.888647  | 15 | 2.640572  | 0.378043  | 0.124264  |
| 6  | -1.151327 | 0.108575  | 2.615063  | 6  | -3.494321 | -1.144695 | 1.295323  |
| 6  | -1.178423 | 0.117082  | 4.005003  | 6  | -2.728475 | -2.287549 | 1.537469  |
| 6  | -0.000023 | -0.001492 | 4.726290  | 6  | -4.733966 | -0.980794 | 1.921497  |
| 6  | 1.178405  | -0.119499 | 4.004958  | 6  | -3.195740 | -3.260554 | 2.413670  |
| 6  | 1.151351  | -0.109962 | 2.615025  | 1  | -1.768460 | -2.433098 | 1.041387  |
| 7  | 0.000023  | -0.000451 | 1.893384  | 6  | -5.195672 | -1.960556 | 2.790401  |
| 6  | 2.448874  | -0.220902 | 1.888550  | 1  | -5.342784 | -0.101683 | 1.721352  |
| 8  | 3.494651  | -0.414608 | 2.474213  | 1  | -2.589406 | -4.145653 | 2.591330  |
| 15 | -2.279014 | 0.055394  | 0.014694  | 1  | -6.161625 | -1.839017 | 3.274844  |
| 6  | -3.252296 | -1.448717 | -0.343272 | 6  | -4.150810 | 0.976145  | -0.649642 |
| 6  | -2.865702 | -2.174270 | -1.476667 | 6  | -4.946780 | 1.934406  | -0.009300 |
| 6  | -3.569136 | -3.317034 | -1.839585 | 6  | -4.403749 | 0.657520  | -1.988815 |
| 6  | -4.645136 | -3.749865 | -1.070249 | 6  | -5.981379 | 2.554691  | -0.701268 |
| 6  | -5.023662 | -3.037331 | 0.063620  | 1  | -4.762360 | 2.197359  | 1.031143  |
| 6  | -4.333140 | -1.886267 | 0.429641  | 6  | -5.443619 | 1.276228  | -2.672466 |
| 6  | -3.267509 | 1.458209  | -0.597756 | 1  | -3.775518 | -0.074648 | -2.495295 |
| 6  | -2.583183 | 2.492099  | -1.243147 | 1  | -6.593878 | 3.299243  | -0.198401 |
| 6  | -3.281758 | 3.602834  | -1.705828 | 1  | -5.631730 | 1.020301  | -3.712036 |
| 6  | -4.658606 | 3.682058  | -1.526828 | 6  | 3.042554  | 1.110061  | 1.748643  |
| 6  | -5.343685 | 2.649650  | -0.889916 | 6  | 3.797092  | 2.287448  | 1.833874  |
| 6  | -4.653085 | 1.536829  | -0.427852 | 6  | 2.549834  | 0.518949  | 2.914078  |
| 1  | -0.000048 | -0.001920 | 5.812088  | 6  | 4.061597  | 2.855855  | 3.073550  |
| 1  | -2.151303 | 0.221032  | 4.479222  | 1  | 4.184764  | 2.751389  | 0.926520  |
| 1  | 2.151280  | -0.223759 | 4.479124  | 6  | 2.815805  | 1.093416  | 4.153115  |
| 1  | 2.013052  | 1.834613  | -2.065356 | 1  | 1.957627  | -0.393490 | 2.842768  |
| 1  | 4.630507  | 1.330909  | 1.318406  | 1  | 4.651449  | 3.767238  | 3.135637  |
| 1  | 3.270439  | 3.876062  | -2.722377 | 1  | 2.431926  | 0.627353  | 5.057166  |
| 1  | 5.861701  | 3.377294  | 0.669287  | 6  | 4.208959  | 0.070125  | -0.739571 |
| 1  | -2.012945 | -1.833743 | -2.066067 | 6  | 4.140291  | -0.271259 | -2.095407 |
| 1  | -4.630518 | -1.331337 | 1.317798  | 6  | 5.441001  | 0.085694  | -0.083619 |
| 1  | -3.270300 | -3.874949 | -2.723908 | 6  | 5.305832  | -0.570708 | -2.788109 |
| 1  | -5.861661 | -3.377504 | 0.667874  | 1  | 3.175107  | -0.311977 | -2.602859 |

|    |           |           |           |    |           |           |           |
|----|-----------|-----------|-----------|----|-----------|-----------|-----------|
| 1  | -1.506927 | 2.404827  | -1.392597 | 6  | 6.601856  | -0.226330 | -0.784008 |
| 1  | -5.191031 | 0.728202  | 0.062644  | 1  | 5.497888  | 0.334103  | 0.974266  |
| 1  | -2.748881 | 4.403029  | -2.213881 | 1  | 5.251006  | -0.830436 | -3.842253 |
| 1  | -6.421062 | 2.711956  | -0.755485 | 1  | 7.559840  | -0.218498 | -0.269471 |
| 1  | 5.189819  | 4.648686  | -1.350985 | 79 | -1.120957 | -0.462671 | -1.333950 |
| 1  | -5.204415 | 4.550119  | -1.890077 | 79 | 1.370382  | -1.556895 | 0.267424  |
| 1  | -5.189717 | -4.648111 | -1.352859 | 17 | 0.500702  | -0.616884 | -3.032893 |
| 1  | 5.190962  | -0.728098 | 0.062157  | 17 | 0.380559  | -3.654184 | 0.605732  |
| 1  | 1.506790  | -2.404220 | -1.393470 | 6  | -6.231202 | 2.226157  | -2.030182 |
| 1  | 6.420961  | -2.711574 | -0.756717 | 1  | -7.039761 | 2.716051  | -2.567496 |
| 1  | 2.748707  | -4.402154 | -2.215498 | 6  | 3.569652  | 2.259372  | 4.232472  |
| 1  | 5.204258  | -4.549346 | -1.891878 | 1  | 3.775216  | 2.707721  | 5.201733  |
| 45 | 0.000033  | 0.000123  | -0.163148 | 6  | 6.535534  | -0.548814 | -2.134719 |
| 17 | 0.000018  | 0.000657  | -2.526294 | 1  | 7.444330  | -0.791996 | -2.680431 |
|    |           |           |           | 6  | -4.426872 | -3.096656 | 3.038713  |
|    |           |           |           | 1  | -4.797337 | -3.859736 | 3.719598  |
